# Supplementary material for: Cetuximab in treatment of metastatic colorectal cancer: final survival analyses and extended RAS data from the NORDIC-VII study
Source: PubMed Central journal article supplement — Br J Cancer. 2017 Apr 11;116(10):1271–8. doi: 10.1038/bjc.2017.93 (PMC5482736; doi:10.1038/bjc.2017.93), 2017-04-11
Supplement: bjc201793x1.pdf [file bjc201793x1.pdf]

| Supplementary Table S1. Additional baseline patient demographics and clinical characteristics |                  |               |              |              |              |               |              |              |              |
|-----------------------------------------------------------------------------------------------|------------------|---------------|--------------|--------------|--------------|---------------|--------------|--------------|--------------|
|                                                                                               | Study population |               |              |              |              |               |              |              |              |
|                                                                                               | ITT              | RAS mutation  |              |              |              | BRAF mutation |              |              |              |
|                                                                                               | Total (n=566)    | Total (n=210) | Arm A (n=63) | Arm B (n=72) | Arm C (n=75) | Total (n=55)  | Arm A (n=19) | Arm B (n=20) | Arm C (n=16) |
| <b>Age (years)</b>                                                                            |                  |               |              |              |              |               |              |              |              |
| Median (range)                                                                                | 62 (24-75)       | 62 (27-75)    | 61 (41-75)   | 62 (27-74)   | 63 (33-74)   | 61 (34-74)    | 63 (35-72)   | 59 (34-73)   | 62 (44-74)   |
| <b>Gender, n (%)</b>                                                                          |                  |               |              |              |              |               |              |              |              |
| Male                                                                                          | 334 (59)         | 121 (58)      | 42 (67)      | 38 (53)      | 41 (55)      | 26 (47)       | 8 (42)       | 9 (45)       | 9 (56)       |
| Female                                                                                        | 232 (41)         | 89 (42)       | 21 (33)      | 34 (47)      | 34 (45)      | 29 (53)       | 11 (58)      | 11 (55)      | 7 (44)       |
| <b>WHO Performance status, n (%)</b>                                                          |                  |               |              |              |              |               |              |              |              |
| 0                                                                                             | 380 (67)         | 143 (68)      | 42 (67)      | 51 (71)      | 50 (67)      | 35 (64)       | 12 (63)      | 13 (65)      | 10 (63)      |
| 1                                                                                             | 162 (29)         | 59 (28)       | 20 (32)      | 19 (26)      | 20 (27)      | 17 (31)       | 7 (37)       | 6 (30)       | 4 (25)       |
| 2                                                                                             | 24 (4)           | 8 (4)         | 1 (2)        | 2 (3)        | 5 (7)        | 3 (6)         | 0            | 1 (5)        | 2 (13)       |
| <b>Site of primary tumour, n (%)</b>                                                          |                  |               |              |              |              |               |              |              |              |
| Colon                                                                                         | 333 (59)         | 115 (55)      | 29 (46)      | 41 (57)      | 45 (60)      | 49 (89)       | 18 (95)      | 17 (85)      | 14 (88)      |
| Rectum                                                                                        | 233 (41)         | 95 (45)       | 34 (54)      | 31 (43)      | 30 (40)      | 6 (11)        | 1 (5)        | 3 (15)       | 2 (13)       |
| <b>Previous treatment, n (%)</b>                                                              |                  |               |              |              |              |               |              |              |              |
| Primary tumour resected                                                                       | 382 (68)         | 157 (75)      | 50 (79)      | 52 (72)      | 55 (73)      | 44 (80)       | 13 (68)      | 17 (85)      | 14 (88)      |
| Adjuvant chemotherapy                                                                         | 51 (9)           | 15 (7)        | 5 (8)        | 2 (3)        | 8 (11)       | 10 (18)       | 3 (16)       | 5 (25)       | 2 (13)       |
| Preoperative radiotherapy                                                                     | 80 (14)          | 35 (17)       | 11 (18)      | 9 (13)       | 15 (20)      | 6 (11)        | 1 (5)        | 3 (15)       | 2 (13)       |
| <b>Timing of metastases, n (%)</b>                                                            |                  |               |              |              |              |               |              |              |              |
| Synchronous                                                                                   | 402 (71)         | 141 (67)      | 40 (64)      | 47 (65)      | 54 (72)      | 38 (69)       | 14 (74)      | 14 (70)      | 10 (63)      |
| Metachronous                                                                                  | 164 (29)         | 69 (33)       | 23 (37)      | 25 (35)      | 21 (28)      | 17 (31)       | 5 (26)       | 6 (30)       | 6 (38)       |
| <b>Number of metastatic sites, n (%)</b>                                                      |                  |               |              |              |              |               |              |              |              |
| 1 site                                                                                        | 162 (29)         | 60 (29)       | 17 (27)      | 25 (35)      | 18 (24)      | 9 (16)        | 3 (16)       | 5 (25)       | 1 (6)        |
| >1 sites                                                                                      | 404 (71)         | 150 (71)      | 46 (73)      | 47 (65)      | 57 (76)      | 46 (84)       | 16 (84)      | 15 (75)      | 15 (94)      |
| <b>Type of metastases, n (%)</b>                                                              |                  |               |              |              |              |               |              |              |              |
| Liver only                                                                                    | 107 (19)         | 34 (16)       | 11 (18)      | 15 (21)      | 8 (11)       | 3 (6)         | 1 (5)        | 2 (10)       | 0            |
| Liver plus other                                                                              | 312 (55)         | 120 (57)      | 34 (54)      | 36 (50)      | 50 (67)      | 31 (56)       | 10 (53)      | 9 (45)       | 12 (75)      |
| Non-liver                                                                                     | 147 (26)         | 56 (27)       | 18 (29)      | 21 (29)      | 17 (23)      | 21 (38)       | 8 (42)       | 9 (45)       | 4 (25)       |
| <b>Investigations, n (%)</b>                                                                  |                  |               |              |              |              |               |              |              |              |
| Alkaline phosphatase level normal                                                             | 298 (53)         | 124 (59)      | 39 (62)      | 40 (56)      | 45 (60)      | 26 (47)       | 9 (47)       | 8 (40)       | 9 (56)       |
| Platelet count < 400 per nL                                                                   | 398 (70)         | 152 (72)      | 42 (67)      | 54 (75)      | 56 (75)      | 34 (62)       | 13 (68)      | 10 (50)      | 11 (69)      |
| White blood cell count < 10 per nL                                                            | 428 (76)         | 166 (79)      | 52 (83)      | 56 (78)      | 58 (77)      | 41 (75)       | 15 (79)      | 14 (70)      | 12 (75)      |
| Abbreviations: ITT, Intention-to-treat                                                        |                  |               |              |              |              |               |              |              |              |
