# Supplementary material for: Cetuximab in treatment of metastatic colorectal cancer: final survival analyses and extended RAS data from the NORDIC-VII study
Source: PubMed Central journal article supplement — Br J Cancer. 2017 Apr 11;116(10):1271–8. doi: 10.1038/bjc.2017.93 (PMC5482736; doi:10.1038/bjc.2017.93), 2017-04-11
Supplement: bjc201793x2.pdf [file bjc201793x2.pdf]

| Supplementary Table S2: Independent prognostic factors in 457 patients according to <i>RAS</i> and <i>BRAF</i> mutation status and pretreatment clinical characteristics (Cox model) |                           |               |        |                  |             |        |                                                                            |             |        |
|--------------------------------------------------------------------------------------------------------------------------------------------------------------------------------------|---------------------------|---------------|--------|------------------|-------------|--------|----------------------------------------------------------------------------|-------------|--------|
|                                                                                                                                                                                      | Progression-free survival |               |        | Overall survival |             |        | Overall survival<br>Censored at start 2nd or<br>3rd line anti-EGFR therapy |             |        |
|                                                                                                                                                                                      | HR                        | (95% CI)      | P      | HR               | 95% CI      | P      | HR                                                                         | 95% CI      | P      |
| <i>RAS/BRAF</i> wild-type                                                                                                                                                            | 1                         |               |        | 1                |             |        | 1                                                                          |             |        |
| <i>RAS</i> mutation                                                                                                                                                                  | 1.38                      | (1.12 - 1.70) | 0.003  | 1.32             | 1.08 - 1.63 | 0.008  | 1.38                                                                       | 1.09 - 1.74 | 0.007  |
| <i>BRAF</i> mutation                                                                                                                                                                 | 2.66                      | (1.94 - 3.64) | <0.001 | 3.23             | 2.36 - 4.41 | <0.001 | 3.62                                                                       | 2.59 - 5.07 | <0.001 |
| WHO PS 0                                                                                                                                                                             | 1                         |               |        | 1                |             |        | 1                                                                          |             |        |
| WHO PS 1                                                                                                                                                                             | 1.49                      | (1.20 - 1.85) | <0.001 | 1.64             | 1.32 - 2.04 | <0.001 | 1.82                                                                       | 1.43 - 2.31 | <0.001 |
| WHO PS 2                                                                                                                                                                             | 1.95                      | (1.21 - 3.15) | 0.006  | 3.48             | 2.18 - 5.57 | <0.001 | 4.06                                                                       | 2.52 - 6.53 | <0.001 |
| ALP level normal                                                                                                                                                                     | 1                         |               |        | 1                |             |        | 1                                                                          |             |        |
| ALP level elevated                                                                                                                                                                   | 1.41                      | (1.16 - 1.73) | 0.001  | 1.91             | 1.57 - 2.34 | <0.001 | 1.95                                                                       | 1.55 - 2.44 | <0.001 |

Abbreviations: HR, Hazard ratio; CI, Confidence interval; PS, Performance status; ALP, Alkaline phosphatase
