# Supplementary material for: Cetuximab in treatment of metastatic colorectal cancer: final survival analyses and extended RAS data from the NORDIC-VII study
Source: PubMed Central journal article supplement — Br J Cancer. 2017 Apr 11;116(10):1271–8. doi: 10.1038/bjc.2017.93 (PMC5482736; doi:10.1038/bjc.2017.93), 2017-04-11
Supplement: bjc201793x3.pdf [file bjc201793x3.pdf]

**Supplementary Table S3: Confirmed overall response rate (ORR)**

|                                                                 | Study population       |                        |                           |                        |                        |
|-----------------------------------------------------------------|------------------------|------------------------|---------------------------|------------------------|------------------------|
|                                                                 | ITT                    | <i>RAS/BRAF</i> tested | <i>RAS/BRAF</i> wild-type | <i>RAS</i> mutant      | <i>BRAF</i> mutant     |
| <b>ORR, (%)</b>                                                 |                        |                        |                           |                        |                        |
| Arm A                                                           | 41                     | 44                     | 50                        | 44                     | 21                     |
| Arm B                                                           | 49                     | 48                     | 61                        | 44                     | 15                     |
| Arm C                                                           | 47                     | 46                     | 60                        | 40                     | 25                     |
| <b>Odds ratio (95% CI), P</b>                                   |                        |                        |                           |                        |                        |
| Arm B vs A                                                      | 1.35 (0.90-2.02), 0.15 | 1.16 (0.74-1.82), 0.53 | 1.54 (0.77-3.09), 0.23    | 1.00 (0.51-1.98), 1.00 | 0.66 (0.13-3.45), 0.62 |
| Arm C vs A                                                      | 1.25 (0.83-1.88), 0.29 | 1.11 (0.70-1.75), 0.66 | 1.48 (0.73-3.00), 0.28    | 0.83 (0.42-1.64), 0.60 | 1.25 (0.26-6.07), 0.78 |
| Arm B + C vs A                                                  | 1.30 (0.91-1.85), 0.15 | 1.13 (0.76-1.68), 0.53 | 1.51 (0.83-2.76), 0.18    | 0.91 (0.50-1.65), 0.76 | 0.91 (0.23-3.59), 0.89 |
| Abbreviations: ITT, Intention-to-treat; CI, Confidence interval |                        |                        |                           |                        |                        |
