# Supplementary material for: Cetuximab in treatment of metastatic colorectal cancer: final survival analyses and extended RAS data from the NORDIC-VII study
Source: PubMed Central journal article supplement — Br J Cancer. 2017 Apr 11;116(10):1271–8. doi: 10.1038/bjc.2017.93 (PMC5482736; doi:10.1038/bjc.2017.93), 2017-04-11
Supplement: bjc201793x4.pdf [file bjc201793x4.pdf]

| Supplementary Table S4: Outcome stratified on origin of primary tumour |                           |                 |      |             |      |                  |      |             |      |
|------------------------------------------------------------------------|---------------------------|-----------------|------|-------------|------|------------------|------|-------------|------|
| Study populations                                                      | Progression-free survival |                 |      |             |      | Overall survival |      |             |      |
|                                                                        | n                         | Median (range)  | HR   | 95% CI      | P    | Median (range)   | HR   | 95% CI      | P    |
| <b>ITT</b>                                                             |                           |                 |      |             |      |                  |      |             |      |
| Colon                                                                  | 333                       | 7.7 (7.1-8.3)   | 1    |             |      | 18.6 (16.4-20.8) | 1    |             |      |
| Rectum                                                                 | 233                       | 8.1 (7.5-8.7)   | 0.89 | (0.75-1.06) | 0.19 | 22.3 (18.9-25.7) | 0.83 | (0.70-0.99) | 0.04 |
| <b>RAS/BRAF tested</b>                                                 |                           |                 |      |             |      |                  |      |             |      |
| Colon                                                                  | 275                       | 7.9 (7.3-8.5)   | 1    |             |      | 19.0 (16.5-21.5) | 1    |             |      |
| Rectum                                                                 | 182                       | 8.3 (7.5-9.1)   | 0.91 | (0.75-1.11) | 0.34 | 23.0 (18.5-27.5) | 0.83 | (0.68-1.01) | 0.06 |
| <b>RAS/BRAF wild-type</b>                                              |                           |                 |      |             |      |                  |      |             |      |
| Colon                                                                  | 111                       | 9.3 (8.0-10.6)  | 1    |             |      | 24.3 (19.9-28.6) | 1    |             |      |
| Rectum                                                                 | 81                        | 9.3 (7.6-11.0)  | 1.03 | (0.76-1.40) | 0.86 | 28.5 (19.9-37.1) | 0.80 | (0.59-1.09) | 0.15 |
| <b>ITT</b>                                                             |                           |                 |      |             |      |                  |      |             |      |
| Colon                                                                  |                           |                 |      |             |      |                  |      |             |      |
| Arm A                                                                  | 105                       | 7.6 (6.8-8.4)   | 1    |             |      | 19.0 (13.6-24.4) | 1    |             |      |
| Arm B                                                                  | 108                       | 8.0 (6.3-9.7)   | 0.94 | (0.70-1.24) | 0.64 | 18.6 (15.5-21.7) | 1.04 | (0.78-1.38) | 0.79 |
| Arm C                                                                  | 120                       | 7.4 (6.2-8.5)   | 1.16 | (0.89-1.53) | 0.28 | 17.4 (14.3-20.6) | 1.19 | (0.90-1.57) | 0.21 |
| Rectum                                                                 |                           |                 |      |             |      |                  |      |             |      |
| Arm A                                                                  | 80                        | 8.3 (7.1-9.5)   | 1    |             |      | 22.3 (16.7-27.9) | 1    |             |      |
| Arm B                                                                  | 86                        | 8.5 (7.1-10.0)  | 0.86 | (0.62-1.19) | 0.37 | 22.6 (15.3-29.9) | 0.78 | (0.56-1.07) | 0.13 |
| Arm C                                                                  | 67                        | 7.2 (6.6-7.8)   | 1.24 | (0.88-1.74) | 0.22 | 21.5 (17.2-25.9) | 0.91 | (0.65-1.27) | 0.58 |
| <b>RAS/BRAF tested</b>                                                 |                           |                 |      |             |      |                  |      |             |      |
| Colon                                                                  |                           |                 |      |             |      |                  |      |             |      |
| Arm A                                                                  | 83                        | 8.0 (7.0-9.0)   | 1    |             |      | 20.1 (15.3-25.0) | 1    |             |      |
| Arm B                                                                  | 91                        | 8.2 (6.5-9.8)   | 0.96 | (0.70-1.32) | 0.80 | 19.7 (15.7-23.7) | 1.01 | (0.74-1.38) | 0.96 |
| Arm C                                                                  | 101                       | 7.6 (6.4-8.9)   | 1.26 | (0.93-1.71) | 0.14 | 17.4 (13.7-21.1) | 1.21 | (0.90-1.64) | 0.21 |
| Rectum                                                                 |                           |                 |      |             |      |                  |      |             |      |
| Arm A                                                                  | 63                        | 8.8 (7.2-10.5)  | 1    |             |      | 23.4 (14.8-32.1) | 1    |             |      |
| Arm B                                                                  | 67                        | 8.3 (6.8-9.8)   | 0.95 | (0.66-1.38) | 0.79 | 23.5 (14.5-32.5) | 0.86 | (0.60-1.24) | 0.43 |
| Arm C                                                                  | 52                        | 7.3 (6.6-7.9)   | 1.29 | (0.88-1.91) | 0.19 | 21.5 (17.0-26.1) | 0.98 | (0.67-1.43) | 0.92 |
| <b>RAS/BRAF wild-type</b>                                              |                           |                 |      |             |      |                  |      |             |      |
| Colon                                                                  |                           |                 |      |             |      |                  |      |             |      |
| Arm A                                                                  | 36                        | 8.9 (7.4-10.4)  | 1    |             |      | 23.6 (16.2-30.9) | 1    |             |      |
| Arm B                                                                  | 33                        | 11.1 (6.5-15.7) | 0.87 | (0.52-1.47) | 0.60 | 24.5 (18.1-31.0) | 1.04 | (0.63-1.72) | 0.88 |
| Arm C                                                                  | 42                        | 9.2 (7.3-11.1)  | 1.11 | (0.69-1.77) | 0.68 | 23.7 (16.9-30.4) | 1.30 | (0.82-2.09) | 0.27 |
| Rectum                                                                 |                           |                 |      |             |      |                  |      |             |      |
| Arm A                                                                  | 28                        | 9.6 (8.1-11.1)  | 1    |             |      | 33.8 (18.7-49.0) | 1    |             |      |
| Arm B                                                                  | 33                        | 7.9 (5.2-10.6)  | 1.31 | (0.75-2.30) | 0.35 | 23.5 (11.6-35.4) | 1.11 | (0.64-1.91) | 0.72 |
| Arm C                                                                  | 20                        | 7.5 (3.5-11.5)  | 1.44 | (0.77-2.69) | 0.25 | 23.0 (0.36-45.6) | 1.31 | (0.72-2.37) | 0.38 |

Abbreviations: HR, Hazard ratio; CI, Confidence interval; ITT, Intention-to-treat
